# Supplementary material
Source: publisher figshare collection journal article supplement (https://acs.figshare.com/ndownloader/files/4468825)
Supplement: Supplementary file 1 [file 4468825]

## Supporting Information:

### Self-Assembly of CdTe Tetrapods into Network Monolayers at the Air/Water Interface

*Matthew D. Goodman, Lei Zhao, Karen A. DeRocher, Jun Wang, Surya K. Mallapragada, and*

*Zhiqun Lin\**

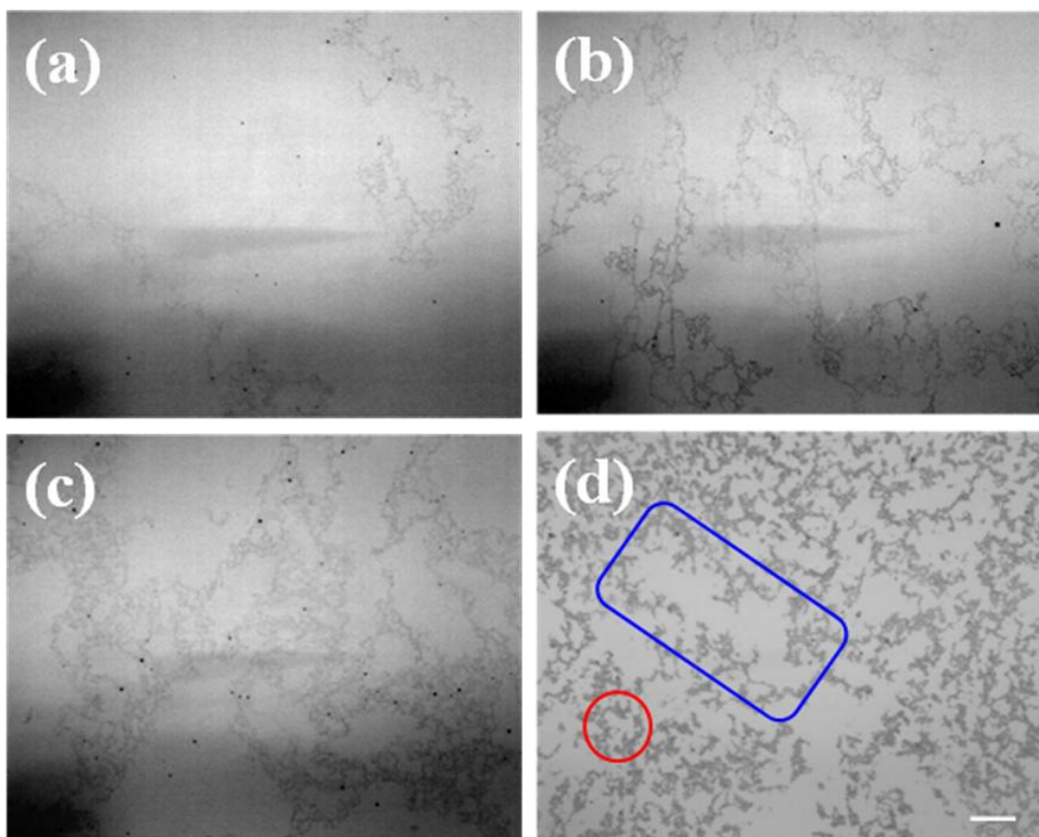

**Figure S1.** Optical micrographs of LB samples obtained at surface pressures of (a)  $\pi = 1$  mN/m, (b)  $\pi = 10$  mN/m, (c)  $\pi = 22$  mN/m, and (d)  $\pi = 39$  mN m<sup>-1</sup>. The original color images were converted into black and white for better contrast. Scale bar = 35  $\mu$ m for all images. Optical micrograph of the 39 mN/m sample shows long range networks; red circle and blue rectangle indicate voids on the tens and hundreds of micrometers, respectively.

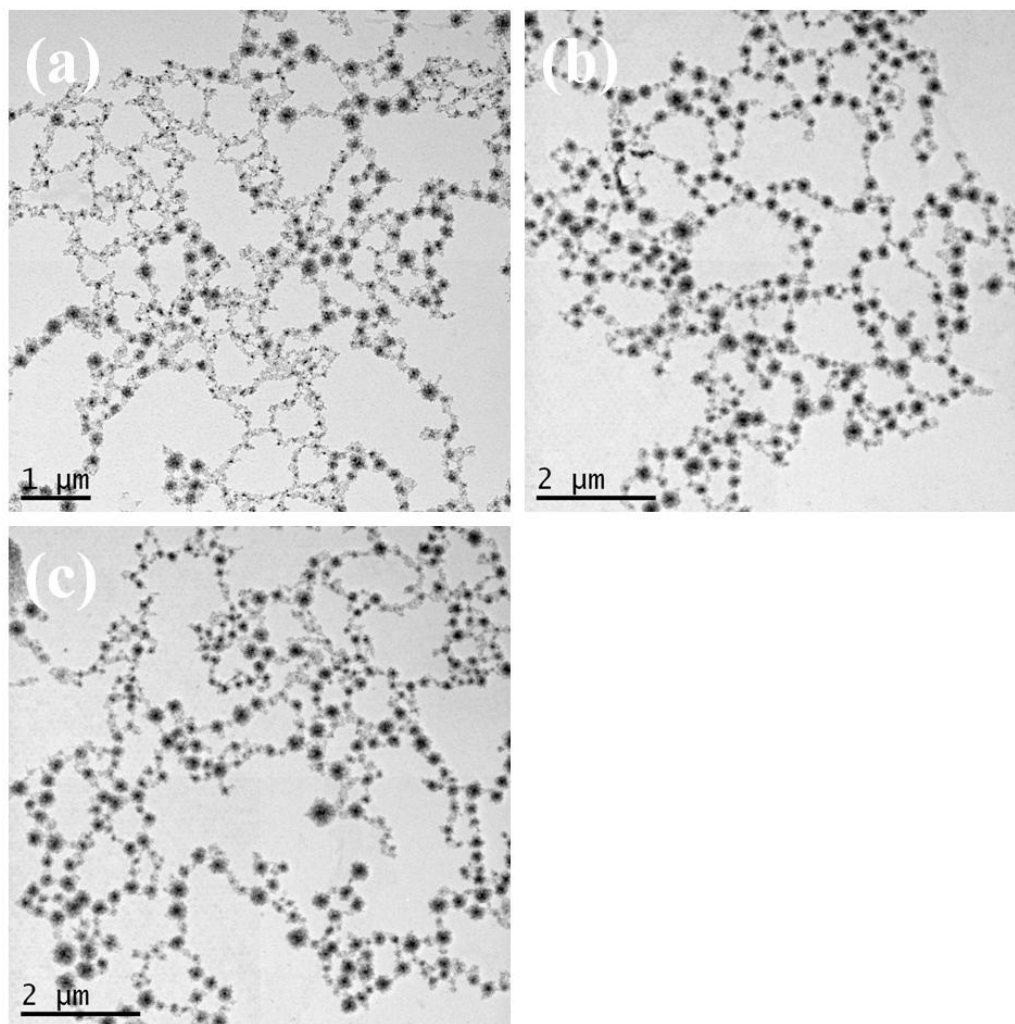

**Figure S2.** TEM images showing tetrapod packing on a large scale from an LB deposition at the surface pressure  $\pi = 39$  mN/m.
